# Supplementary material for: Mapping Quantitative Trait Loci onto Chromosome-scale Pseudomolecules in Flax
Source: Preprints.org preprint supplement (doi:10.20944/preprints201901.0126.v1), 2019-01-14
Supplement: Supplementary file 1 [file supplementary]

# A User Guide for Mapping QTL onto the Most Recent Release of the Chromosome-scale Pseudomolecules in Flax

Frank M. You and Sylvie Cloutier

Ottawa Research and Development Centre, Agriculture and Agri-Food Canada, Ottawa, ON K1A 0C6, Canada

This user guide provides a brief description of the methods with their software tools and database files for mapping QTL onto the most recent release of the chromosome-scale pseudomolecules in flax (You et al. 2018).

In the supplementary files, there is a folder named “program\_packages” that contains four Perl scripts (Program\_S[1-4]\_\*.pl), a user guide document (UserGuideS1.doc), and two subfolders “sample\_data” and “database\_files”. Please copy all scripts and files in the two subfolders to a working folder.

## 1. Reference sequences

The most recent release of the flax pseudomolecules (You et al. 2016) includes 15 sequences corresponding to 15 flax chromosomes. Their accession numbers in NCBI and sequence lengths are listed in the following table:

Sequences of 15 chromosomes in the NCBI database.

| Chromosome | NCBI accession | Length of sequence (bp) |
|------------|----------------|-------------------------|
| Lu1        | CP027619       | 29,425,369              |
| Lu2        | CP027626       | 25,730,386              |
| Lu3        | CP027627       | 26,636,119              |
| Lu4        | CP027628       | 19,927,942              |
| Lu5        | CP027629       | 17,699,757              |
| Lu6        | CP027630       | 18,078,158              |
| Lu7        | CP027631       | 18,299,719              |
| Lu8        | CP027632       | 23,785,339              |
| Lu9        | CP027633       | 22,091,576              |
| Lu10       | CP027620       | 18,203,127              |
| Lu11       | CP027621       | 19,887,771              |
| Lu12       | CP027622       | 20,889,232              |
| Lu13       | CP027623       | 20,483,506              |
| Lu14       | CP027624       | 19,392,306              |
| Lu15       | CP027625       | 15,636,771              |
| Total      |                | 316,167,078             |

These sequences can be downloaded directly from the NCBI nucleotide databases by searching individual accession number, for example, at <https://www.ncbi.nlm.nih.gov/nuccore/CP027619>, or by using NCBI Batch Entrez for batch download at <https://www.ncbi.nlm.nih.gov/sites/batchentrez>. All sequences can be saved in a fasta file.

If you only need to convert coordinates of SNPs from the scaffolds based reference sequences onto the most recent release of the chromosome-scale pseudomolecules, you do not need to download these sequence. These sequences are required only when you map PCR based markers to the flax pseudomolecules.

## 2. Mapping PCR based markers to the most recent release of the chromosome-scale pseudomolecules

The electronic PCR (e-PCR) method is used to map paired PCR primers onto the flax pseudomolecules (Schuler, 1997). The source code for the e-PCR program is freely available (<ftp://ncbi.nlm.nih.gov/pub/schuler/e-PCR/>).

Two executive programs, “fahash” and “re-PCR”, are included in the e-PCR program package. You need to download the source code to compile it and then place two executable files into the same working directory. The two executable programs can be also saved in any other folder but a path pointing to them must be correctly set so that the Perl scripts can access them.

### Step 1. Create a search database

Usage:

```
perl ProgramS1_prepare_rePCR_data.pl
  -i fasta file name of the reference sequence (* is allowed)
  -s genome name as file name prefix
  -m maximum number of sequences for each database (Default:5000)
```

Default parameters for the “fahash” program are used in the ProgramS1\_prepare\_rePCR\_data.pl script:  
`$cmd = "fahash -b $genome_hash -w 12 -f3 $genome_map";`

Two output files “\*.famap” and “\*.hash” will be generated in this step.

### Step 2. Mapping PCR markers to the reference genome

Usage:

```
perl ProgramS2_rePCR_pipeline.pl
  -p primer file (required)
  -d reference genome hash file (required, generated from
ProgramS1_prepare_rePCR_data.pl, both *.famap and *.hash must be available)
  -m number of mismatches (default: 0)
  -g number of gaps (default: 0)
```

### Example:

#### Step 1:

Flax pseudomolecule sequences are saved in a file in fasta format, e.g.,

**flax\_pseudomolecules.fasta**

```
perl ProgramS1_prepare_rePCR_data.pl -i flax_pseudomolecules.fasta -s
flax_new_pseudo
```

Two output files will be generated in this step:

flax\_new\_pseudo\_1.famap

flax\_new\_pseudo\_1.hash

## Step 2:

```
perl ProgramS2_rePCR_pipeline.pl -p program_S2_sample_marker_data.txt -d
flax_new_pseudo_1.hash
```

A sample marker file “program\_S2\_sample\_marker\_data.txt” is included in the program package. This file contains a header line with four columns separated by a tab key (\t). The last column is the amplicon size range of the PCR marker. It must have the following format:

| Primer ID | Forward Primer            | Reverse Primer           | Size range |
|-----------|---------------------------|--------------------------|------------|
| Lu2164    | GCATGATCGTTACTTTAGGATGC   | AATGACGCCATCTTTTGTCC     | 50-1500    |
| Lu2183    | CTTCATGCAGTCCGTTTTTACA    | CAGTTCGTAGTTTACTTGGTGCAG | 50-1500    |
| Lu2532    | GGATAGAAGCTCACCGATGC      | TTCAGAGCACCAGCAGAAAA     | 50-1500    |
| Lu2545    | TGCTTTGCTAATTTATTATGGTGAG | ATGGTAGCTGGTGGGTGAAC     | 50-1500    |
| Lu2555    | TCCCGCTTTTAAATGGTGTTTC    | AATTGGAAGCTCGATTACACG    | 50-1500    |
| Lu2560    | CGTGGCTACTAGCAATGTGG      | TCCTCATGTTTCATTGCTTGC    | 50-1500    |
| Lu2564    | TTTCAGCTTCGATTGAGACG      | ATCCGTCGAGGTAACAGTCC     | 50-1500    |

The “flax\_new\_pseudo\_1.hash” and “flax\_new\_pseudo\_1.famap” generated from Step 1 must be in the same working directory.

## An output file

“program\_S2\_sample\_marker\_data.txt\_primer\_rePCR\_results.txt” will be generated:

| #- sts | seq | strand | from     | to       | mism | gaps | act_len/exp_len |
|--------|-----|--------|----------|----------|------|------|-----------------|
| Lu2164 | 1   | -      | 22948222 | 22948580 | 0    | 0    | 359/50-1500     |
| Lu2183 | 1   | -      | 26435050 | 26435329 | 0    | 0    | 280/50-1500     |
| Lu2555 | 6   | +      | 14948801 | 14948986 | 0    | 0    | 186/50-1500     |
| Lu2560 | 6   | -      | 13553559 | 13553779 | 0    | 0    | 221/50-1500     |
| Lu2564 | 6   | -      | 13620999 | 13621234 | 0    | 0    | 236/50-1500     |
| Lu2532 | 7   | -      | 661757   | 662020   | 0    | 0    | 264/50-1500     |
| #-     |     |        |          |          |      |      |                 |
| Done   |     |        |          |          |      |      |                 |

## 3. Mapping SNPs on scaffold reference sequences to the most recent release of the chromosome-scale pseudomolecules

### Usage:

```
perl ProgramS3_convert_scaffold_coordinates_to_pseudochr.pl
-m scaffold to pseudomolecule mapping file. Table S4 must be used.
-d scaffold coordinate data file which must have three column: marker name,
scaffold IDs and coordinates
```

The “program\_S3\_sample\_marker\_data.txt” is a sample marker data file that must contain three columns separated by a tab key (\t):

| Marker              | Scaffold ID  | Coordinate_on_scaffold |
|---------------------|--------------|------------------------|
| scaffold112_114241  | scaffold112  | 114241                 |
| scaffold1491_318496 | scaffold1491 | 318496                 |
| scaffold31_1800846  | scaffold31   | 1800846                |
| scaffold344_309662  | scaffold344  | 309662                 |
| scaffold51_1349321  | scaffold51   | 1349321                |
| scaffold59_572553   | scaffold59   | 572553                 |
| scaffold156_641874  | scaffold156  | 641874                 |
| scaffold147_367986  | scaffold147  | 367986                 |
| scaffold859_123972  | scaffold859  | 123972                 |
| scaffold297_275113  | scaffold297  | 275113                 |
| scaffold361_14957   | scaffold361  | 14957                  |
| scaffold273_68457   | scaffold273  | 68457                  |

The “TableS4\_flax\_scaffolds\_corrordinates\_in\_new\_pseudomolecules.txt” is a database file that contains accurate information for mapping scaffold sequences to the pseudomolecules. This file is provided in the program package.

### Example:

```
perl ProgramS3_convert_scaffold_coordinates_to_pseudochr.pl -m
TableS4_flax_scaffolds_corrordinates_in_new_pseudomolecules.txt -d
program_S3_sample_marker_data.txt
```

A “program\_S3\_sample\_marker\_data.txt.converted.txt” will be generated:

| Marker              | Scaffold ID  | Coordinate_on_scaffold | Chr | New_Chrr_Coord |
|---------------------|--------------|------------------------|-----|----------------|
| scaffold112_114241  | scaffold112  | 114241                 | 1   | 18444086       |
| scaffold1491_318496 | scaffold1491 | 318496                 | 6   | 14006651       |
| scaffold31_1800846  | scaffold31   | 1800846                | 3   | 3929932        |
| scaffold344_309662  | scaffold344  | 309662                 | 1   | 11008279       |
| scaffold51_1349321  | scaffold51   | 1349321                | 4   | 10532424       |
| scaffold59_572553   | scaffold59   | 572553                 | 1   | 10051709       |
| scaffold156_641874  | scaffold156  | 641874                 | 3   | 5906791        |
| scaffold147_367986  | scaffold147  | 367986                 | 5   | 11288517       |
| scaffold859_123972  | scaffold859  | 123972                 | 15  | 1939372        |
| scaffold297_275113  | scaffold297  | 275113                 | 1   | 16435852       |
| scaffold361_14957   | scaffold361  | 14957                  | 1   | 16726904       |
| scaffold273_68457   | scaffold273  | 68457                  | 8   | 585113         |

The last two columns are the converted results, including chromosome numbers and new coordinates on chromosomes.

#### 4. Candidate Gene Scanning of QTL

Usage:

```
perl ProgramS4_flax_QTL_candidate_gene_scanning.pl
  -q QTL file
  -d gene annotation file
  -w upstream or downstream window size (bp) (default: 100000 bp)
```

A sample data file for QTL data “program\_S4\_sample\_qtl\_data.txt” is provided in the program package. This file must have four columns separated by a tab key (\t):

| Trait | QTL         | Chr | Coord_start | Coord_end |
|-------|-------------|-----|-------------|-----------|
| PM    | QPM-crc-LG1 | 1   | 16920407    | 18739647  |
| PM    | QPM-crc-LG7 | 7   | 3817603     | 3817863   |
| PM    | QPM-crc-LG9 | 9   | 357191      | 357510    |

The gene annotation files “TableS6\_flax\_RGA\_coords.txt” and “TableS5\_flax\_all\_genes\_coords.txt” are two database files that contain coordinates of all resistance gene analogs (RGAs) or all protein coding genes on the pseudomolecules and their functional annotation information. Each of them can be used for a different purpose (scanning RGAs or all genes). These two files are provided in the program package.

The upstream or downstream window size of the QTL position can be specified. The default value is 100000 bp (i.e. 100 kb). That means that all genes/RGAs within a total of 200 kb window of both upstream and downstream of a QTL on a chromosome will be scanned. You can input a different value for the window size.

**Example 1: scan resistance gene analogs within a 200 kb window covering upstream and downstream of the QTL position (default)**

```
perl ProgramS4_flax_QTL_candidate_gene_scanning.pl -q
program_S4_sample_qtl_data.txt -d TableS6_flax_RGA_coords.txt
```

A result file “program\_S4\_sample\_qtl\_data.txt\_gene\_annotations.txt” will be generated in the following format:

| Trait | QTL         | Chr | Coord_st | Coord_er | chr | ID          | start    | end      | strand | type  | scaffold     | refined scaff |
|-------|-------------|-----|----------|----------|-----|-------------|----------|----------|--------|-------|--------------|---------------|
| PM    | QPM-crc-LG1 | 1   | 1.7E+07  | 1.9E+07  | 1   | Lus10026756 | 17134471 | 17137673 | +      | RLK   | scaffold361  | scaffold361   |
| PM    | QPM-crc-LG1 | 1   | 1.7E+07  | 1.9E+07  | 1   | Lus10026761 | 17159664 | 17161647 | +      | RLK   | scaffold361  | scaffold361   |
| PM    | QPM-crc-LG1 | 1   | 1.7E+07  | 1.9E+07  | 1   | Lus10026765 | 17189168 | 17189470 | -      | NBS   | scaffold361  | scaffold361   |
| PM    | QPM-crc-LG1 | 1   | 1.7E+07  | 1.9E+07  | 1   | Lus10009703 | 18125241 | 18127926 | +      | RLK   | scaffold455  | scaffold455   |
| PM    | QPM-crc-LG7 | 7   | 3817603  | 3817863  | 7   | Lus10023437 | 3725947  | 3732607  | +      | TM-CC | scaffold1216 | scaffold1216  |
| PM    | QPM-crc-LG9 | 9   | 357191   | 357510   | 9   | Lus10001677 | 429431   | 436772   | -      | RLK   | scaffold2739 | scaffold2739  |

**Example 2: scan all protein coding genes within a 200 kb window covering upstream and downstream of the QTL position (default)**

```
perl ProgramS4_flax_QTL_candidate_gene_scanning.pl -q
program_S4_sample_qtl_data.txt -d TableS5_flax_all_genes_coords.txt
```

A result file with the same file name

“program\_S4\_sample\_qtl\_data.txt\_gene\_annotations.txt” will be generated in the following format that slightly different from Example 1 (only part of results are shown):

| Trait | QTL         | Chr | Coord_start | Coord_end | chr | ID          | start    | end      | strand | functional annotation                           | scaffold    | refined scafa | arabidopsis | gene names | dummy |
|-------|-------------|-----|-------------|-----------|-----|-------------|----------|----------|--------|-------------------------------------------------|-------------|---------------|-------------|------------|-------|
| PM    | QPM-crc-LG1 | 1   | 16920407    | 18739647  | 1   | Lus10018097 | 18332046 | 18334006 | +      | Lipase class 3-related protein                  | scaffold112 | scaffold112   | AT5G24230.1 |            | 1     |
| PM    | QPM-crc-LG1 | 1   | 16920407    | 18739647  | 1   | Lus10018098 | 18338780 | 18340866 | +      | GRAS family transcription factor family protein | scaffold112 | scaffold112   | AT2G01570.1 | RGA, RGA1  | 1     |
| PM    | QPM-crc-LG1 | 1   | 16920407    | 18739647  | 1   | Lus10018099 | 18362462 | 18364039 | -      | GRAS family transcription factor family protein | scaffold112 | scaffold112   | AT2G01570.1 | RGA, RGA1  | 1     |
| PM    | QPM-crc-LG1 | 1   | 16920407    | 18739647  | 1   | Lus10018100 | 18395486 | 18397366 | -      | GRAS family transcription factor family protein | scaffold112 | scaffold112   | AT2G01570.1 | RGA, RGA1  | 1     |
| PM    | QPM-crc-LG1 | 1   | 16920407    | 18739647  | 1   | Lus10018101 | 18399363 | 18400709 | -      | GRAS family transcription factor family protein | scaffold112 | scaffold112   | AT2G01570.1 | RGA, RGA1  | 1     |
| PM    | QPM-crc-LG1 | 1   | 16920407    | 18739647  | 1   | Lus10018102 | 18406876 | 18410238 | +      | Glycosyl hydrolase family protein               | scaffold112 | scaffold112   | AT5G20950.1 |            | 1     |
| ..... |             |     |             |           |     |             |          |          |        |                                                 |             |               |             |            |       |

## References

- You, F.M.; Xiao, J.; Li, P.; Yao, Z.; Jia, G.; He, L.; Zhu, T.; Luo, M.-C.; Wang, X.; Deyholos, M.K., *et al.* Chromosome-scale pseudomolecules refined by optical, physical, and genetic maps in flax. *Plant J.* **2018**, *95*, (2), 371-384.
- Schuler, G.D. Sequence mapping by electronic PCR. *Genome Res.* **1997**, *7*, (5), 541-550.
